# Supplementary material for: Stimulation of ribosomal frameshifting by RNA G-quadruplex structures
Source: PubMed Central journal article supplement (PMC3919603; doi:10.1093/nar/gkt1022), 2013-10-30
Supplement: supp_gkt1022_nar-02074-f-2013-File002.pdf [file supp_gkt1022_nar-02074-f-2013-File002.pdf]

**Supporting Information  
for**

**Stimulation of ribosomal frameshifting by RNA  
G-quadruplex structures**

*Chien-Hung Yu<sup>1</sup>, Marie-Paule Teulade-Fichou<sup>2</sup>, and René C.L.  
Olsthoorn<sup>1\*</sup>*

<sup>1</sup>Department of Molecular Genetics, Leiden Institute of  
Chemistry, Leiden University, PO Box 9502, Leiden, The  
Netherlands.

<sup>2</sup>Institut Curie, UMR 176-CNRS, Bât 110, Université Paris-Sud,  
91405 Orsay, France.

\*To whom correspondence may be addressed. E-mail:  
[olsthoor@chem.leidenuniv.nl](mailto:olsthoor@chem.leidenuniv.nl)

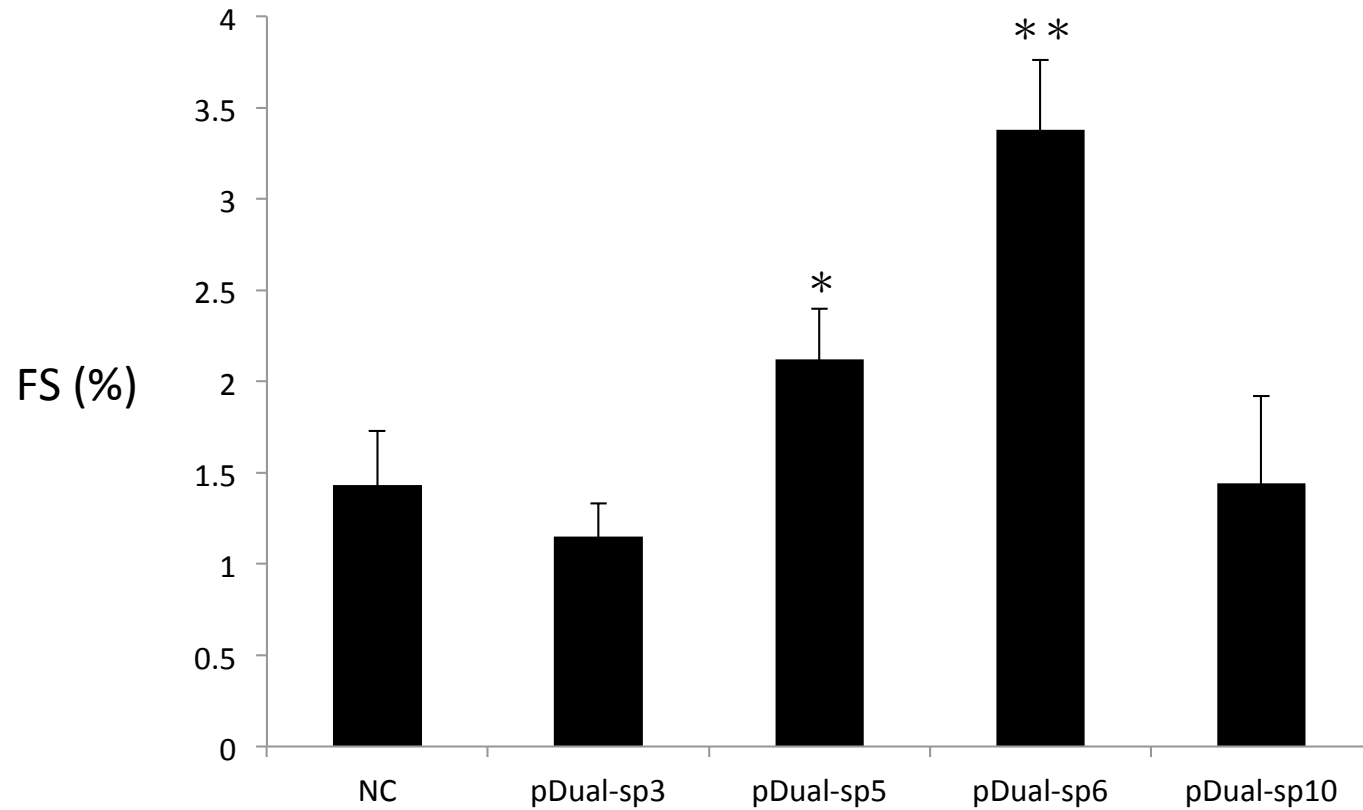

Figure S1. -1 FS in HEK293T cells. Selected spacer-length constructs were assayed for the ability to induce -1 FS in HEK293T cells. The -1 FS efficiency was obtained by measuring the Renilla and Firefly luciferases activity of the frameshift reporter constructs (see Materials and Methods). NC is a negative control in which the (GGGU)<sub>3</sub>GGG motif of pDual-sp5 was changed to AGGUGGAUGGGUGGG. The indicated efficiency and error are from at least two independent triplicate experiments. \*compared to NC,  $p < 0.1$ ; \*\*compared to NC,  $p < 0.01$ .

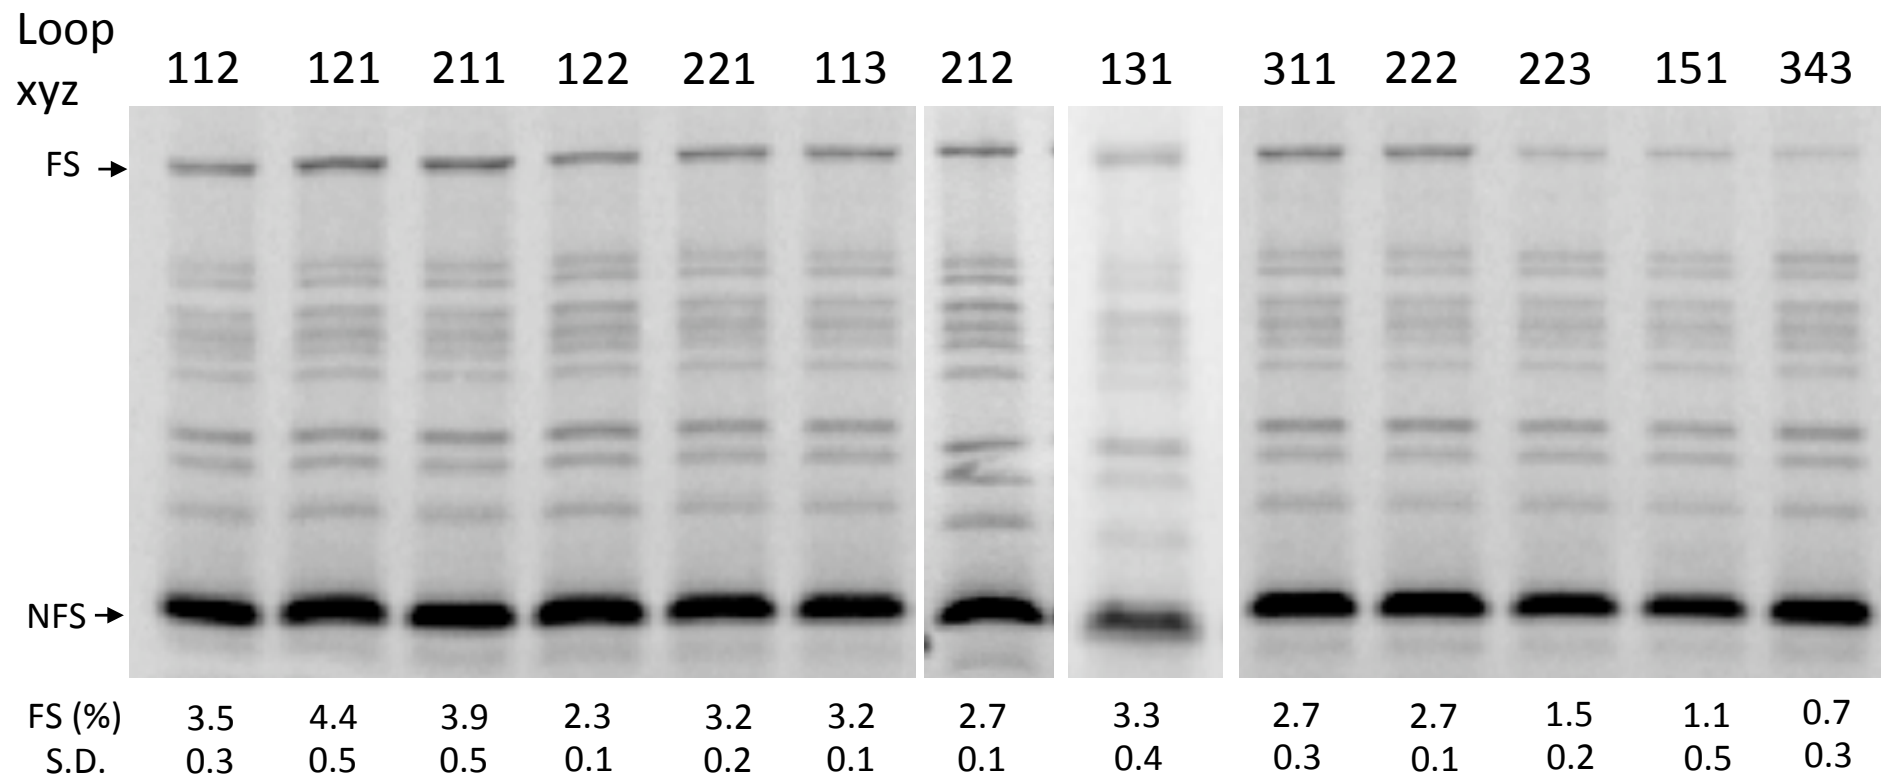

Figure S2. Effect of loop length of RNA G4 induced  $-1$  FS. SDS-PAGE analysis of  $^{35}\text{S}$ -methionine labeled translation products using G4s with different loop sizes. The numbering above each lane indicates the number of U's in each of the three loops xyz in  $\text{GGGUxGGGUyGGGUzGGG}$ , with the exception of "343" where the loops are UUA, UUUU, UUA. "FS" and "NFS" indicate the frameshifted and non-frameshifted products.

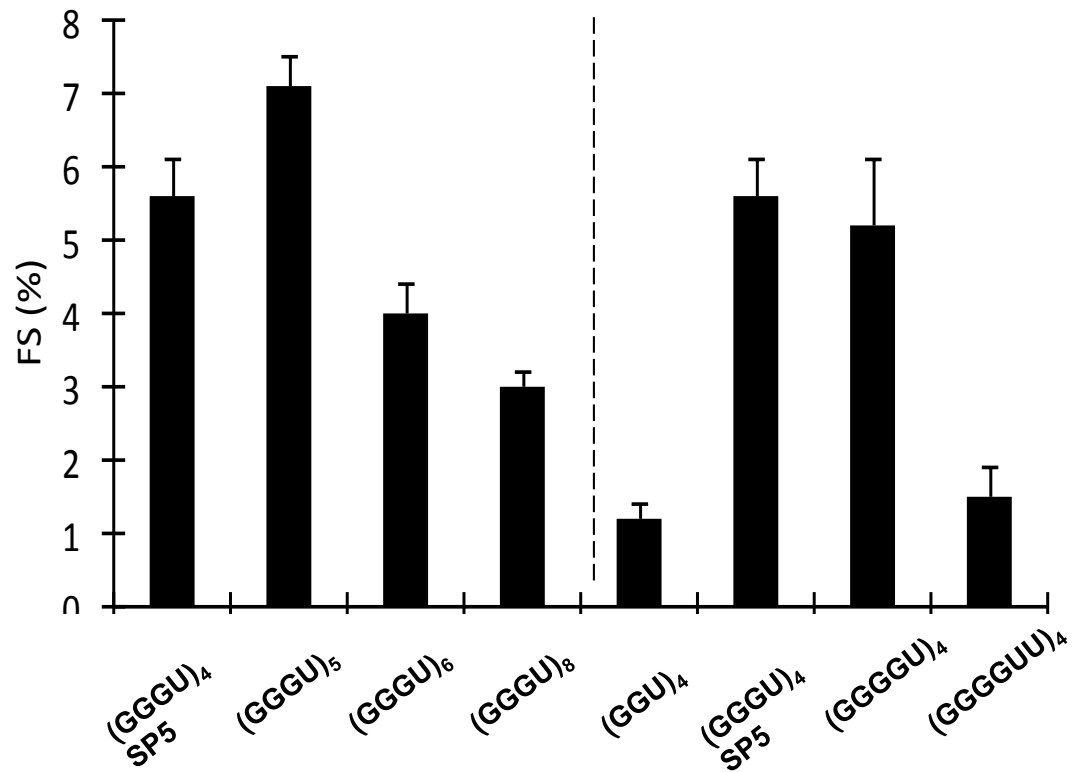

Figure S3. The  $-1$  FS efficiency of various numbers of  $(G_3U)$  repeats (left) and various numbers of G-quartets (right). The graph shows the  $-1$  FS efficiency (indicated by bars, y-axis) in correlation with corresponding constructs (indicated on the x-axis).

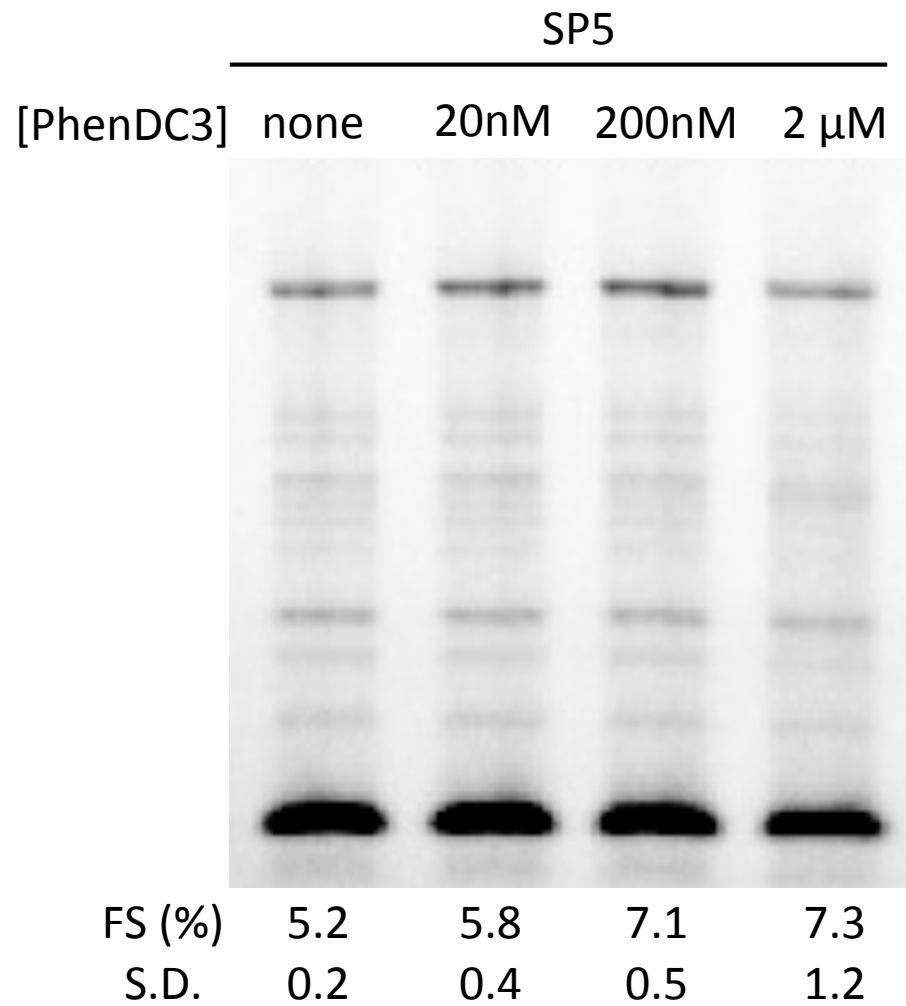

Figure S4. Enhancement of  $-1$  FS by a G4 stabilizing ligand. Various concentrations (0-2  $\mu$ M) of a G4-specific bisquinolinium compound, PhenDC3, were incubated with the SP5 mRNA and assayed for  $-1$  FS efficiency in RRL.

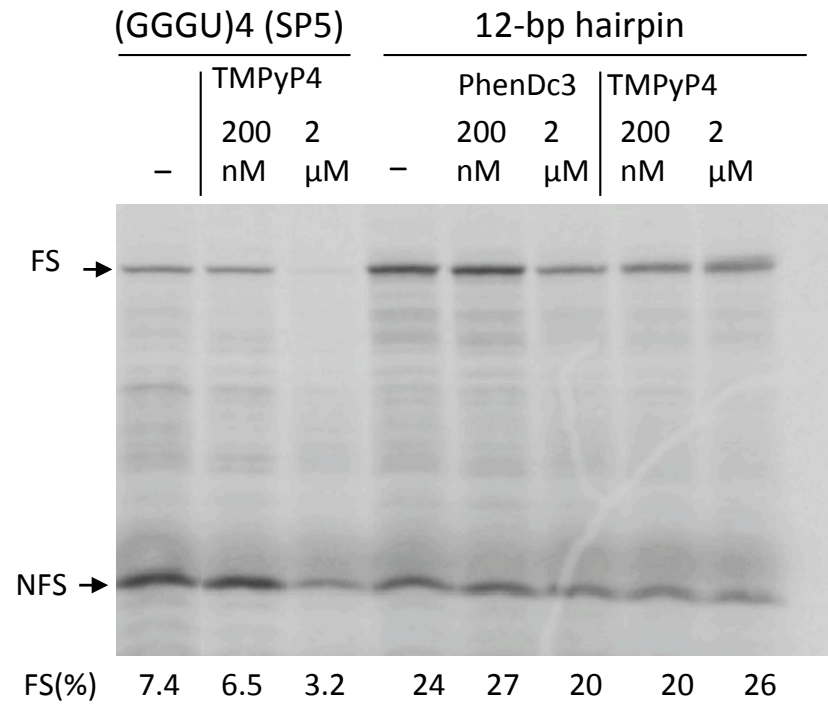

Figure S5. G4 specific ligands influence frameshifting induced by a G4 structure but not by an RNA hairpin. SDS-PAGE showing <sup>35</sup>S-methionine labeled translation products obtained by the indicated constructs in RRL in the presence of various concentrations of PhenDC3 or TMPyP4. -1 FS is monitored by the presence of a 65-kD product, indicated by "FS". The 0-frame product is indicated by "NFS".
